# Supplementary material for: Preparation of AuNPs/GQDs/SiO2 Composite and Its Catalytic Performance in Oxidation of Veratryl Alcohol
Source: Hindawi journal article supplement (doi:10.1155/2017/4130569), 2017-01-01
Supplement: f1 [file 4130569.f1.pdf]

## Electronic Supplementary Information

### Preparation of AuNPs/GQDs/SiO<sub>2</sub> Composite and its catalytic performance in oxidation of veratryl alcohol

Yaoyao Yang<sup>1,2</sup>, Jiali Zhang<sup>1</sup>, Fangwei Zhang<sup>1</sup> and Shouwu Guo<sup>1</sup>

<sup>1</sup> Department of Electronic Engineering, School of Electronic Information and  
Electrical Engineering, Shanghai Jiao Tong University, Shanghai 200240, P.R. China.

<sup>2</sup> School of Materials Science and Engineering, University of Shanghai for Science and  
Technology, Shanghai 200093, P.R. China.

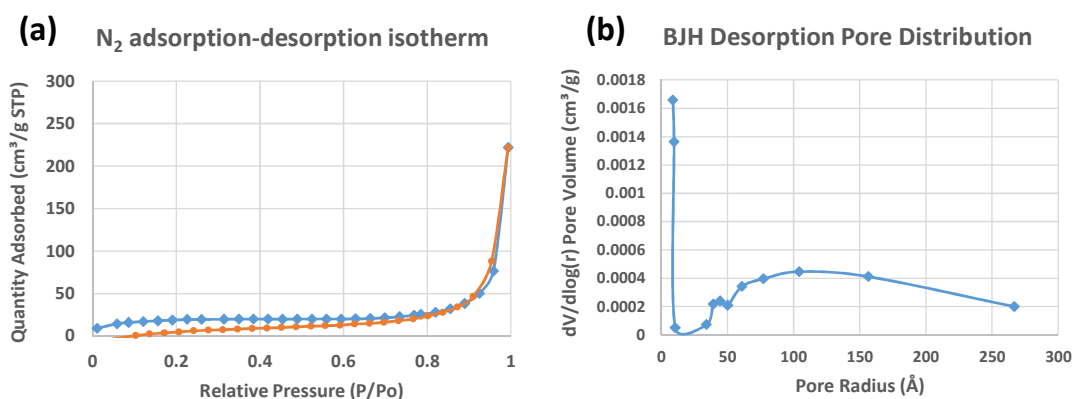

Fig. S1 (a) N<sub>2</sub> adsorption-desorption isotherm, and (b) BJH Desorption Pore Distribution of the composites AuNPs/GQDs/SiO<sub>2</sub>.

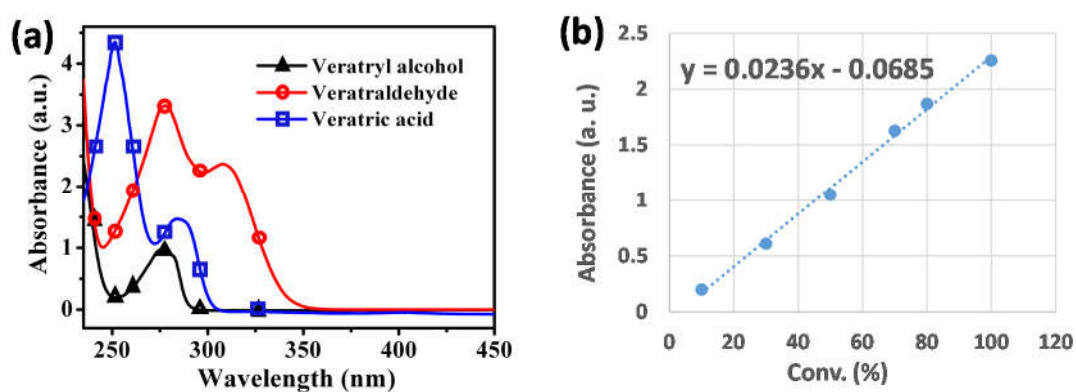

Fig. S2 (a) UV-Vis absorption spectra of veratryl alcohol, veratraldehyde and veratric acid. (b) The standard curve used for the calculation of veratraldehyde yield, in which the conversion ratio is the horizontal coordinate, and the UV absorption is the vertical coordinate.
